# Supplementary material for: Senior orienteering athletes as a model of healthy aging: a mixed-method approach
Source: PubMed Central journal article supplement (PMC4495641; doi:10.1186/s12877-015-0072-6), 2015-07-08
Supplement: 12877_2015_72_MOESM1_ESM.pdf [file 12877_2015_72_MOESM1_ESM.pdf]

**Additional file 1 Questionnaire median scores OR subjects scoring low on FGAS**

| <b>Subjects</b>     | <b>FGAS</b> | <b>FGAS</b>   | <b>FGAS</b>   | <b>EQ-VAS</b>   | <b>EQ-Index</b> | <b>HI</b>       | <b>GSRS</b> | <b>HADS</b>      |
|---------------------|-------------|---------------|---------------|-----------------|-----------------|-----------------|-------------|------------------|
|                     |             | <i>Summer</i> | <i>Winter</i> |                 |                 |                 |             |                  |
| <i>Score range:</i> | <i>1-6</i>  | <i>1-6</i>    | <i>1-6</i>    | <i>0-100</i>    | <i>0-1</i>      | <i>9-36</i>     | <i>1-7</i>  | <i>0-42</i>      |
| <b>subject 1</b>    | 3           | 3             | 3             | 98 <sup>a</sup> | 1.0             | 28 <sup>b</sup> | 1.1         | 2.0              |
| <b>subject 2</b>    | 3           | 3             | 3             | 90              | 1.0             | 35 <sup>a</sup> | 1.1         | 1.0 <sup>b</sup> |
| <b>subject 3</b>    | 3           | 3             | 3             | 75 <sup>b</sup> | 0.8             | 29              | 1.1         | 2.0              |
| <b>subject 4</b>    | 3           | 3             | 3             | 80 <sup>b</sup> | 0.9             | 32              | 1.4         | 5.0              |
| <b>subject 5</b>    | 3           | 3             | 3             | 85              | 1.0             | 33              | 1.3         | 1.0 <sup>b</sup> |
| <b>subject 6</b>    | 3           | 3             | 3             | 90              | 0.8             | 31              | 1.1         | 4.0              |

a: Values scored above the 75% percentile, b: Values scored below the 25% percentile
