# Supplementary material for: Senior orienteering athletes as a model of healthy aging: a mixed-method approach
Source: PubMed Central journal article supplement (PMC4495641; doi:10.1186/s12877-015-0072-6), 2015-07-08
Supplement: 12877_2015_72_MOESM2_ESM.pdf [file 12877_2015_72_MOESM2_ESM.pdf]

**Additional file 2 Questionnaire median scores for OR subjects scoring high on HADS**

| <b>Subjects</b>     | <b>HADS</b> | <b>HADS</b>       | <b>HADS</b>     | <b>EQ-VAS</b>   | <b>EQ-Index</b>   | <b>HI</b>       | <b>GSRS</b>      | <b>FGAS</b> |
|---------------------|-------------|-------------------|-----------------|-----------------|-------------------|-----------------|------------------|-------------|
|                     |             | <i>Depression</i> | <i>Anxiety</i>  |                 |                   |                 |                  |             |
| <i>Score range:</i> | <i>0-42</i> | <i>0-21</i>       | <i>0-21</i>     | <i>0-100</i>    | <i>0-1</i>        | <i>9-36</i>     | <i>1-7</i>       | <i>1-6</i>  |
| <b>subject 7</b>    | 11          | 3                 | 8 <sup>a</sup>  | 70 <sup>b</sup> | 0.79 <sup>b</sup> | 33              | 1.6              | 6           |
| <b>subject 8</b>    | 16          | 6 <sup>a</sup>    | 10 <sup>a</sup> | 90              | 0.73 <sup>b</sup> | -               | 2.1 <sup>a</sup> | 5.5         |
| <b>subject 9</b>    | 12          | 2                 | 10 <sup>a</sup> | 50 <sup>b</sup> | 0.69 <sup>b</sup> | 22 <sup>b</sup> | 1.8 <sup>a</sup> | 4           |
| <b>subject 10</b>   | 19          | 12 <sup>a</sup>   | 7 <sup>a</sup>  | 80 <sup>b</sup> | 0.86              | 27 <sup>b</sup> | 1.4              | 4           |
| <b>subject 11</b>   | 13          | 4 <sup>a</sup>    | 9 <sup>a</sup>  | 90              | 0.73 <sup>b</sup> | 26 <sup>b</sup> | 1.8 <sup>a</sup> | 4.5         |
| <b>subject 12</b>   | 14          | 6 <sup>a</sup>    | 8 <sup>a</sup>  | 90              | 0.79 <sup>b</sup> | 27 <sup>b</sup> | 1.5              | 5           |
| <b>subject 13</b>   | 11          | 2                 | 9 <sup>a</sup>  | 75 <sup>b</sup> | 0.77 <sup>b</sup> | 25 <sup>b</sup> | 2.7 <sup>a</sup> | 5           |
| <b>subject 14</b>   | 13          | 5 <sup>a</sup>    | 8 <sup>a</sup>  | 80 <sup>b</sup> | 0.80              | 27 <sup>b</sup> | 1.8 <sup>a</sup> | 4           |
| <b>subject 15</b>   | 14          | 3                 | 11 <sup>a</sup> | 75 <sup>b</sup> | 0.77 <sup>b</sup> | 28 <sup>b</sup> | 1.8 <sup>a</sup> | 4           |

a: Values scored above the 75% percentile, b: Values scored below the 25% percentile
